# Supplementary material for: Nail Melatonin Content: A Suitable Non-Invasive Marker of Melatonin Production
Source: PubMed Central journal article supplement (PMC7831915; doi:10.3390/ijms22020921), 2021-01-18
Supplement: ijms-22-00921-s001.pdf [file ijms-22-00921-s001.pdf]

# **Nail Melatonin Content: A Suitable Non-Invasive Marker of Melatonin Production**

Alex Gomez-Gomez, Blanca Montero-San Martin, Noemí Haro and Oscar J Pozo

**Supplemental Information**

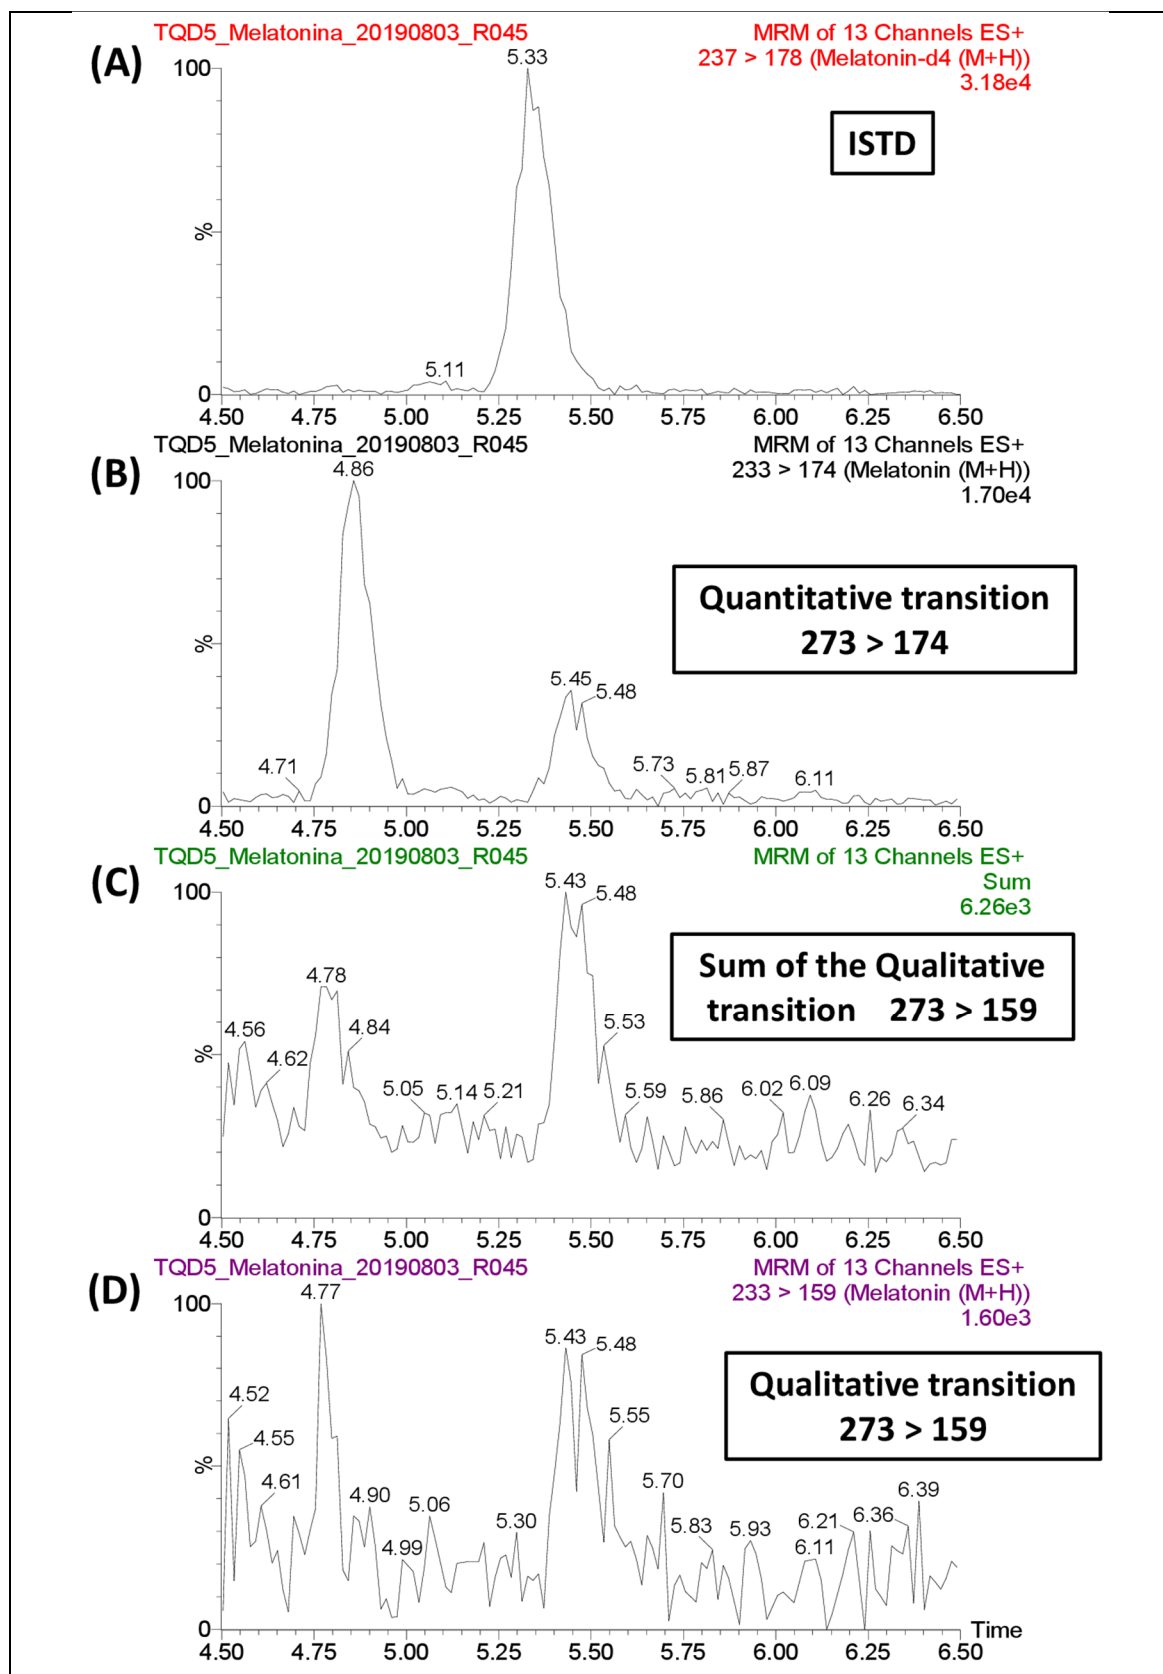

**Figure S1.** Chromatogram representation of SRM transitions of melatonin in a real nail sample (18 fg/mg). (A) Melatonin-d4, (B) Melatonin (273 > 174 transition, quantitative), (C) Melatonin (summation of 273 > 159 transition, qualitative) and (D) Melatonin (single 273 > 159 transition, qualitative).



**Table S1.** Melatonin levels (in fg/mg) in the selected population. Abbreviations: F: female and M: male.

| <b>Vol.</b> | <b>Age</b> | <b>Sex</b> | <b>Melatonin</b> | <b>Vol.</b> | <b>Age</b> | <b>Sex</b> | <b>Melatonin</b> | <b>Vol.</b> | <b>Age</b> | <b>Sex</b> | <b>Melatonin</b> |
|-------------|------------|------------|------------------|-------------|------------|------------|------------------|-------------|------------|------------|------------------|
| <b>1</b>    | 5          | F          | 134              | <b>29</b>   | 50         | F          | 61               | <b>57</b>   | 31         | M          | 118              |
| <b>2</b>    | 6          | F          | 86               | <b>30</b>   | 54         | F          | 18               | <b>58</b>   | 32         | M          | 138              |
| <b>3</b>    | 6          | F          | 123              | <b>31</b>   | 59         | F          | 62               | <b>59</b>   | 33         | M          | 52               |
| <b>4</b>    | 7          | F          | 158              | <b>32</b>   | 60         | F          | 23               | <b>60</b>   | 36         | M          | 89               |
| <b>5</b>    | 8          | F          | 153              | <b>33</b>   | 60         | F          | 38               | <b>61</b>   | 40         | M          | 82               |
| <b>6</b>    | 17         | F          | 58               | <b>34</b>   | 61         | F          | 82               | <b>62</b>   | 42         | M          | 55               |
| <b>7</b>    | 20         | F          | 149              | <b>35</b>   | 62         | F          | 83               | <b>63</b>   | 43         | M          | 44               |
| <b>8</b>    | 25         | F          | 55               | <b>36</b>   | 64         | F          | 76               | <b>64</b>   | 43         | M          | 117              |
| <b>9</b>    | 27         | F          | 52               | <b>37</b>   | 64         | F          | 103              | <b>65</b>   | 44         | M          | 20               |
| <b>10</b>   | 27         | F          | 54               | <b>38</b>   | 66         | F          | 79               | <b>66</b>   | 44         | M          | 60               |
| <b>11</b>   | 29         | F          | 250              | <b>39</b>   | 69         | F          | 9                | <b>67</b>   | 47         | M          | 31               |
| <b>12</b>   | 31         | F          | 42               | <b>40</b>   | 69         | F          | 38               | <b>68</b>   | 47         | M          | 36               |
| <b>13</b>   | 34         | F          | 123              | <b>41</b>   | 69         | F          | 50               | <b>69</b>   | 47         | M          | 52               |
| <b>14</b>   | 35         | F          | 122              | <b>42</b>   | 70         | F          | 9                | <b>70</b>   | 48         | M          | 38               |
| <b>15</b>   | 36         | F          | 35               | <b>43</b>   | 71         | F          | 15               | <b>71</b>   | 48         | M          | 61               |
| <b>16</b>   | 36         | F          | 128              | <b>44</b>   | 71         | F          | 36               | <b>72</b>   | 49         | M          | 28               |
| <b>17</b>   | 37         | F          | 45               | <b>45</b>   | 71         | F          | 45               | <b>73</b>   | 53         | M          | 71               |
| <b>18</b>   | 40         | F          | 26               | <b>46</b>   | 72         | F          | 13               | <b>74</b>   | 54         | M          | 34               |
| <b>19</b>   | 40         | F          | 127              | <b>47</b>   | 72         | F          | 85               | <b>75</b>   | 58         | M          | 18               |
| <b>20</b>   | 43         | F          | 25               | <b>48</b>   | 73         | F          | 89               | <b>76</b>   | 61         | M          | 30               |
| <b>21</b>   | 43         | F          | 39               | <b>49</b>   | 84         | F          | 25               | <b>77</b>   | 63         | M          | 19               |
| <b>22</b>   | 43         | F          | 67               | <b>50</b>   | 96         | F          | 12               | <b>78</b>   | 65         | M          | 58               |
| <b>23</b>   | 43         | F          | 69               | <b>51</b>   | 5          | M          | 208              | <b>79</b>   | 67         | M          | 37               |
| <b>24</b>   | 47         | F          | 34               | <b>52</b>   | 7          | M          | 102              | <b>80</b>   | 69         | M          | 21               |
| <b>25</b>   | 47         | F          | 65               | <b>53</b>   | 8          | M          | 119              | <b>81</b>   | 70         | M          | 16               |
| <b>26</b>   | 47         | F          | 107              | <b>54</b>   | 14         | M          | 147              | <b>82</b>   | 71         | M          | 19               |
| <b>27</b>   | 48         | F          | 51               | <b>55</b>   | 19         | M          | 76               | <b>83</b>   | 75         | M          | 80               |
| <b>28</b>   | 50         | F          | 47               | <b>56</b>   | 27         | M          | 67               | <b>84</b>   | 79         | M          | 29               |

**Table S2.** Melatonin levels (in fg/mg) in fingernails and toenails. Abbreviations: F: female and M: male.

| Vol. | Age | Sex | Melatonin (fg/mg) |          |
|------|-----|-----|-------------------|----------|
|      |     |     | Fingernails       | Toenails |
| 1    | 5   | F   | 134               | 52       |
| 2    | 6   | F   | 86                | 53       |
| 3    | 6   | F   | 123               | 119      |
| 4    | 8   | F   | 153               | 141      |
| 5    | 27  | F   | 52                | 75       |
| 6    | 40  | F   | 127               | 139      |
| 7    | 43  | F   | 67                | 42       |
| 8    | 47  | F   | 34                | 131      |
| 9    | 47  | F   | 107               | 56       |
| 10   | 50  | F   | 47                | 21       |
| 11   | 58  | F   | 67                | 47       |
| 12   | 59  | F   | 62                | 196      |
| 13   | 71  | F   | 45                | 22       |
| 14   | 27  | M   | 67                | 28       |
| 15   | 32  | M   | 138               | 101      |
| 16   | 42  | M   | 55                | 32       |
| 17   | 43  | M   | 117               | 112      |
| 18   | 44  | M   | 60                | 18       |
| 19   | 47  | M   | 31                | 37       |
| 20   | 48  | M   | 24                | 10       |
| 21   | 61  | M   | 30                | 28       |
| 22   | 75  | M   | 80                | 26       |

Abbreviations: Vol.: Volunteer.
